# Supplementary material for: Malic Enzyme 1 as a Novel Anti‐Ferroptotic Regulator in Hepatic Ischemia/Reperfusion Injury
Source: PubMed Central journal article supplement (PMC10161122; doi:10.1002/advs.202205436), 2023-02-25
Supplement: ADVS-10-2205436-s001.pdf [file ADVS-10-2205436-s001.pdf]

## Supporting Information

for *Adv. Sci.*, DOI 10.1002/adv.202205436

Malic Enzyme 1 as a Novel Anti-Ferroptotic Regulator in Hepatic Ischemia/Reperfusion Injury

*Xuexian Fang\**, *Jiawei Zhang*, *You Li*, *Yijing Song*, *Yingying Yu*, *Zhaoxian Cai*, *Fuzhi Lian*, *Jun Yang*, *Junxia Min* and *Fudi Wang\**

**Supporting Information for**

**Malic Enzyme 1 as a Novel Anti-ferroptotic Regulator in  
Hepatic Ischemia/Reperfusion Injury**

Xuexian Fang *et al.*

**This PDF file includes:**

**Figures S1-12**

**Tables S1-2**

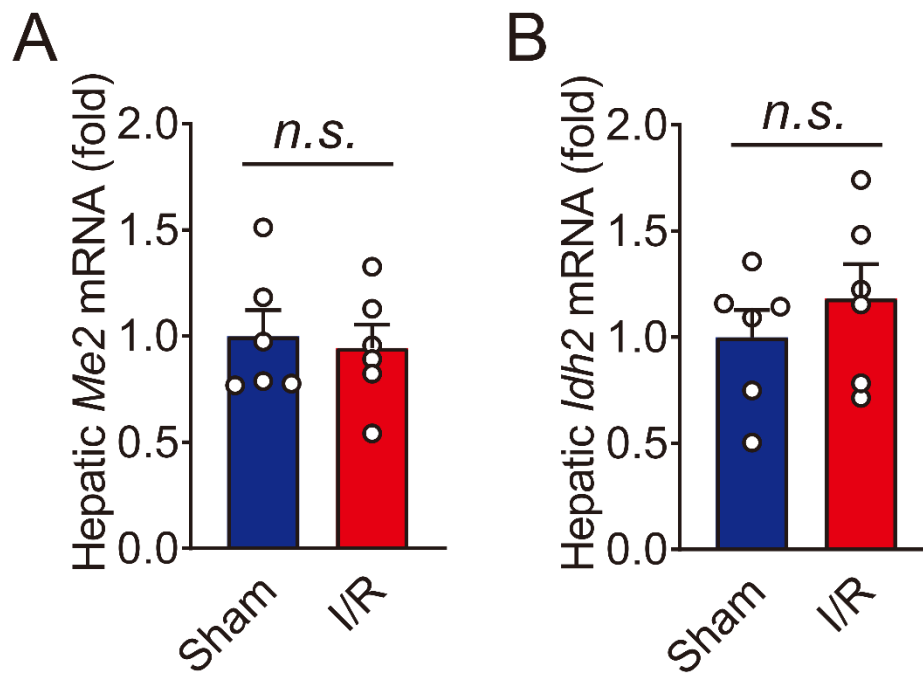

**Figure S1.** Hepatic *Me2* (A) and *Idh2* (B) mRNA of were measured in mice with sham or I/R injury. Significance was calculated by Student's *t*-test; n.s.=not significant.

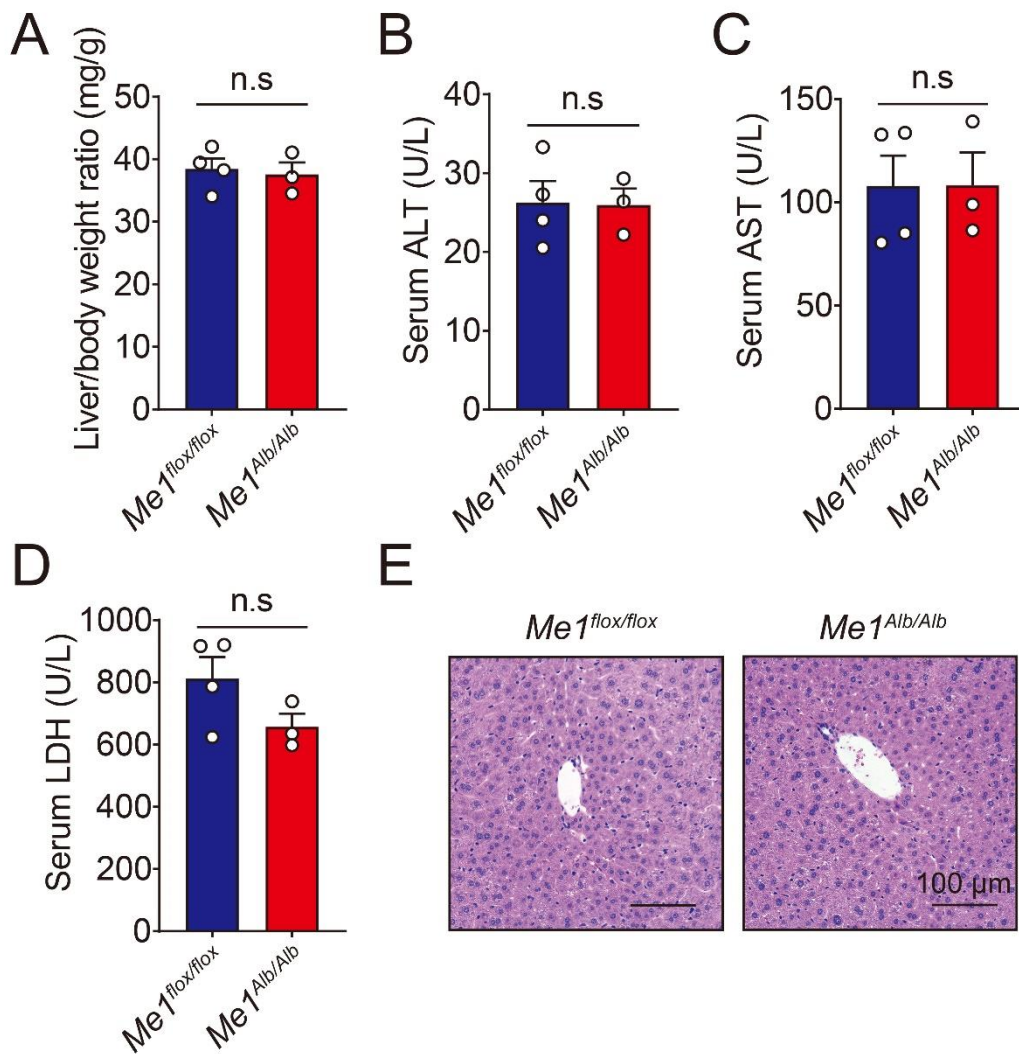

**Figure S2.** Hepatocyte-specific deletion of *Me1* is not sufficient to induce liver injury in mice. (A-C) Serum levels of ALT (A), AST (B), and LDH (C) were measured in  $Me1^{flox/flox}$  and  $Me1^{Alb/Alb}$  mice. (D) Representative H&E-stained liver sections from  $Me1^{flox/flox}$  and  $Me1^{Alb/Alb}$  mice. Significance was calculated by Student's *t*-test; n.s.=not significant.

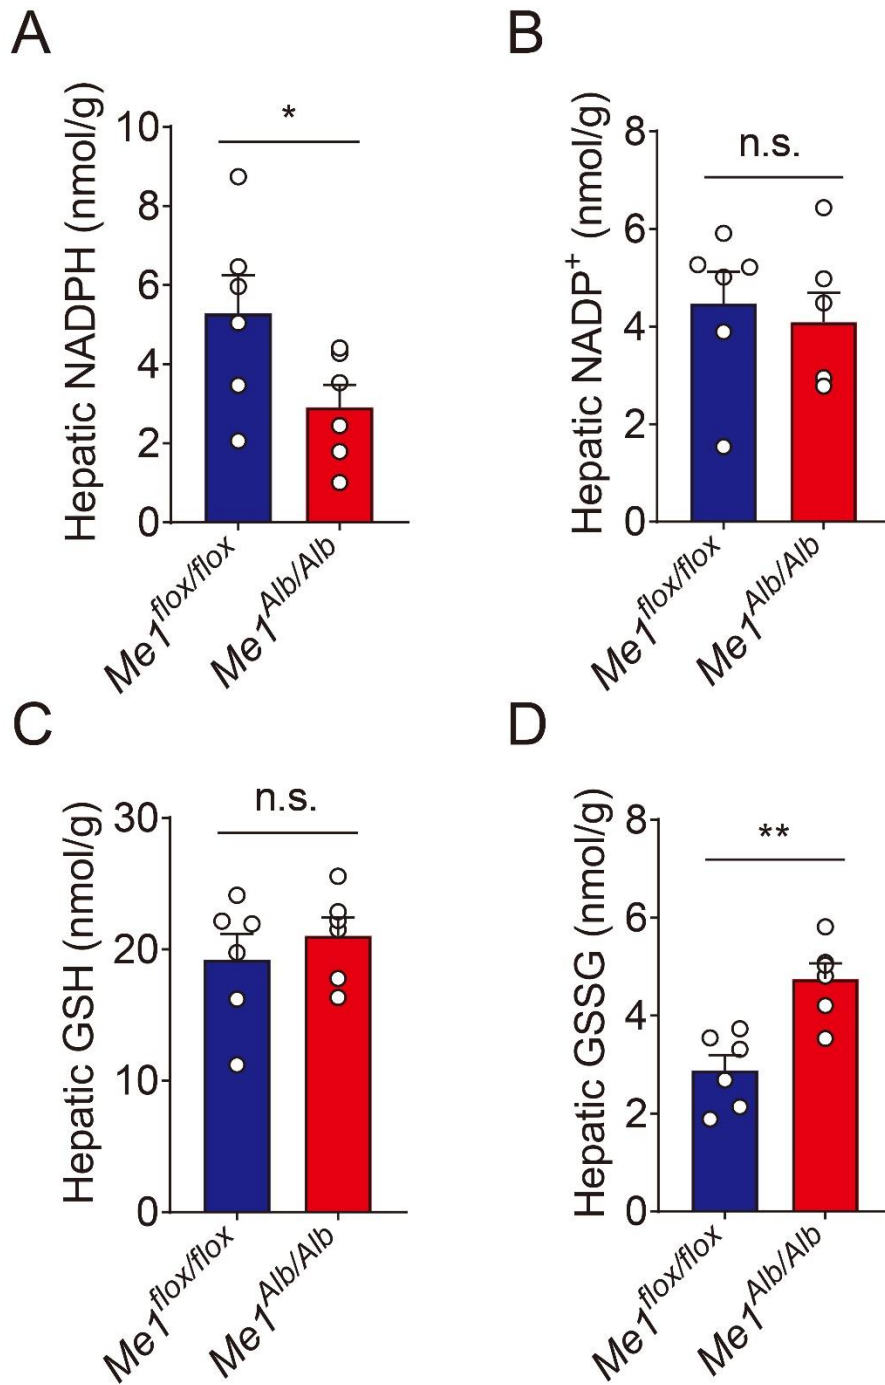

**Figure S3.** Hepatic levels of NADPH (A), NADP<sup>+</sup> (B), GSH (C), and GSSG (D) were measured in *Me1<sup>flox/flox</sup>* and *Me1<sup>Alb/Alb</sup>* mice subjected to I/R injury. Significance was calculated by Student's *t*-test; \**P*<0.05, \*\**P*<0.01, \*\*\**P*<0.001, n.s.=not significant.

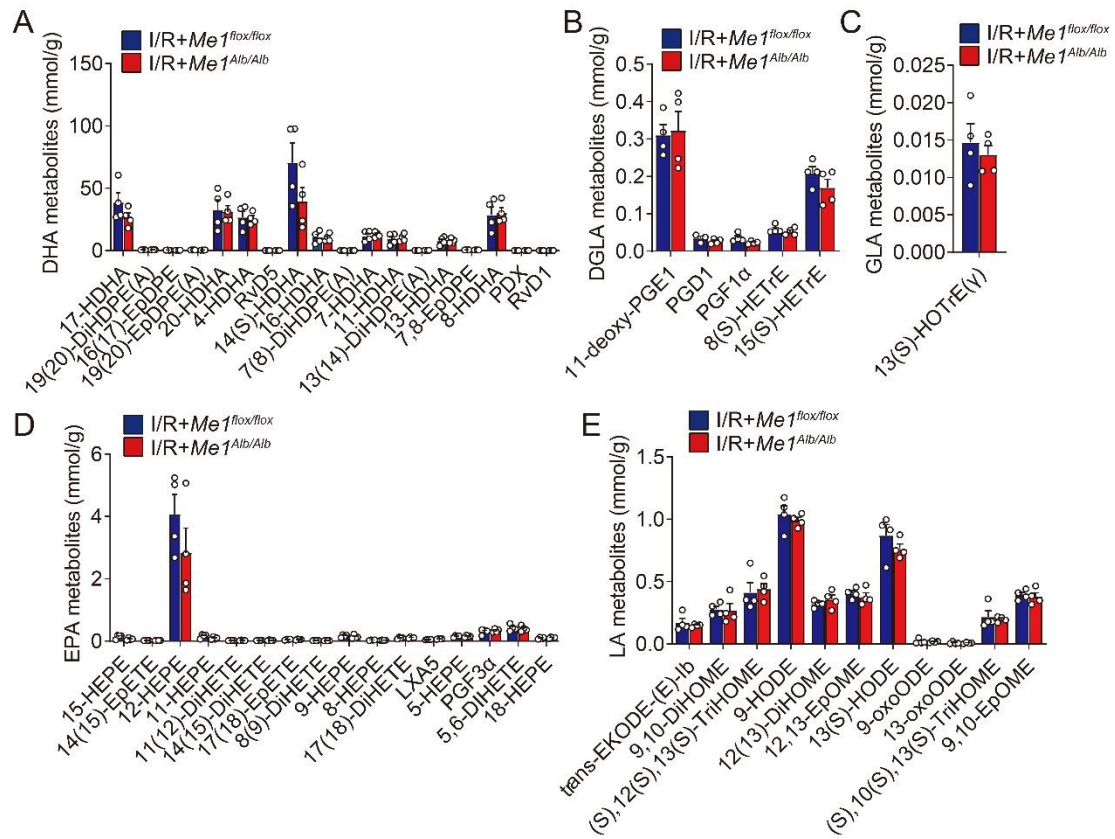

**Figure S4.** Hepatic docosahexaenoic acid (DHA) metabolites (A), dihomo- $\gamma$ -linolenic acid (DGLA) metabolites (B),  $\gamma$ -linolenic acid (GLA) metabolites (C), eicosapentaenoic acid (EPA) metabolites (D), linoleic acid (LA) metabolites (E) in *Me1<sup>flox/flox</sup>* and *Me1<sup>Alb/Alb</sup>* mice subjected to I/R injury. Significance was calculated by Student's *t*-test.

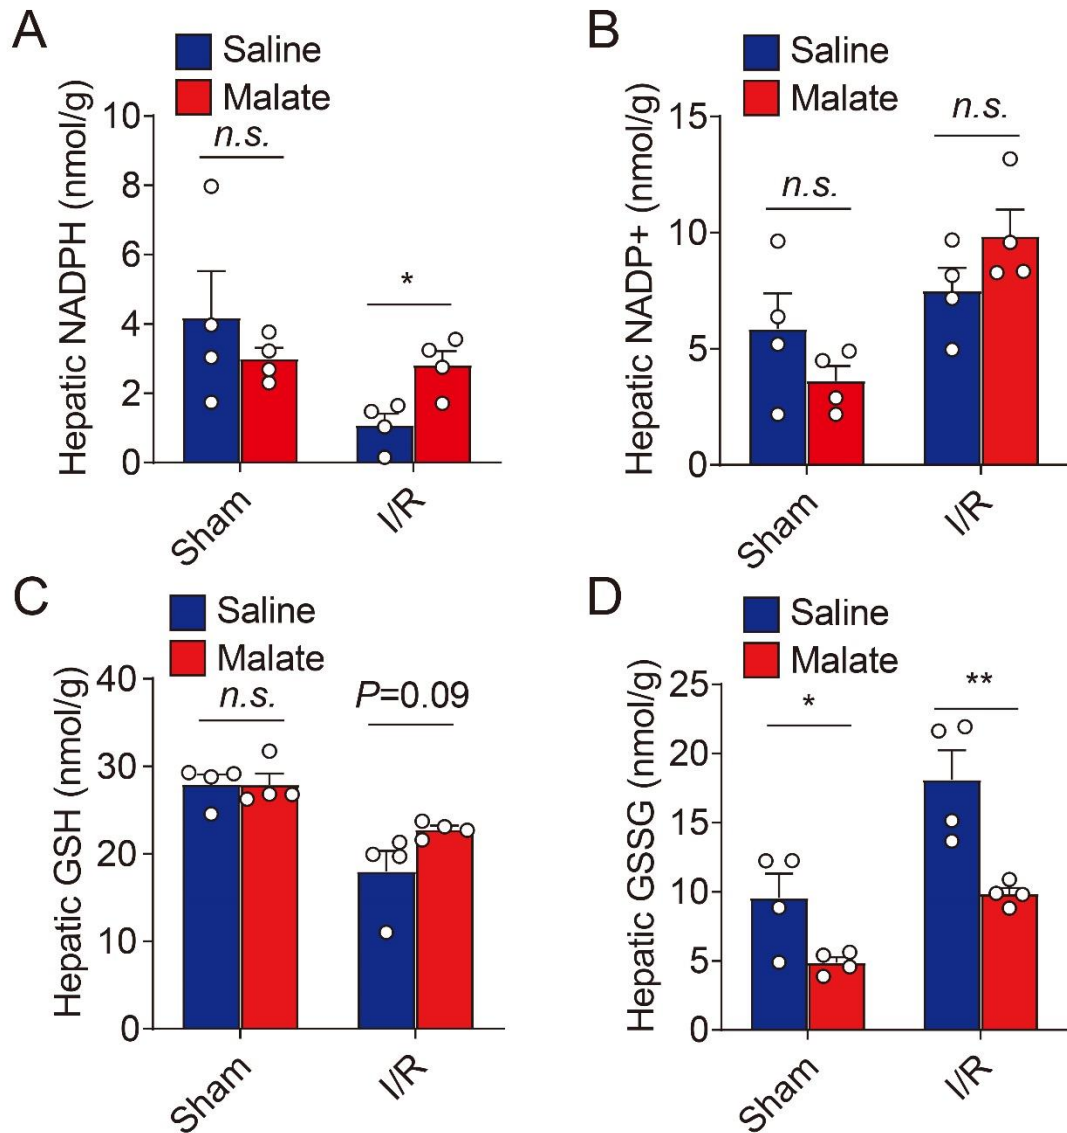

**Figure S5.** Hepatic levels of NADPH (A), NADP<sup>+</sup> (B), GSH (C), and GSSG (D) were measured in sham- or I/R-treated mice with or without malate supplementation. Significance was calculated by Student's *t*-test; \**P*<0.05, \*\**P*<0.01, \*\*\**P*<0.001, n.s.=not significant.

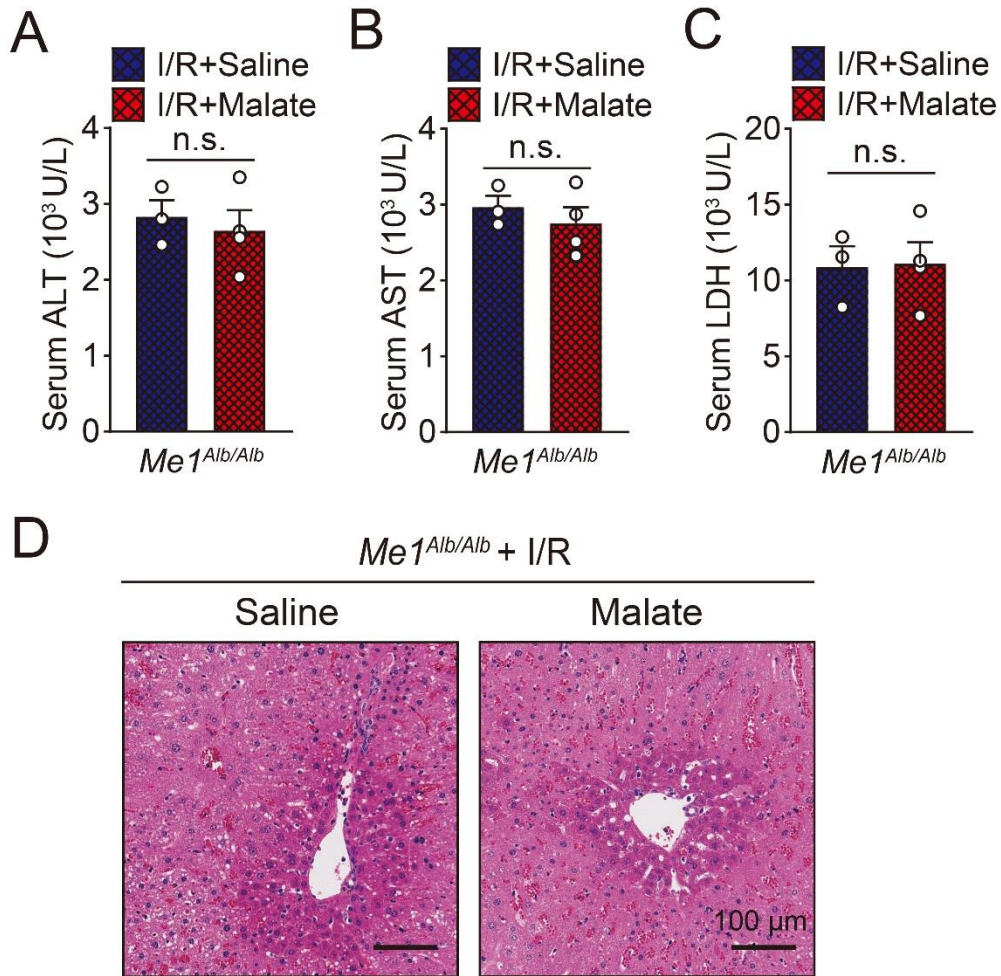

**Figure S6.** Effect of malate supplementation on *Me1<sup>Alb/Alb</sup>* mice subjected to I/R injury. (A-C) Serum levels of ALT (A), AST (B), and LDH (C) were measured in I/R-treated *Me1Alb/Alb* mice with or without malate supplementation. (D) Representative H&E-stained liver sections from indicated mice. Significance was calculated by Student's *t*-test; n.s.=not significant.



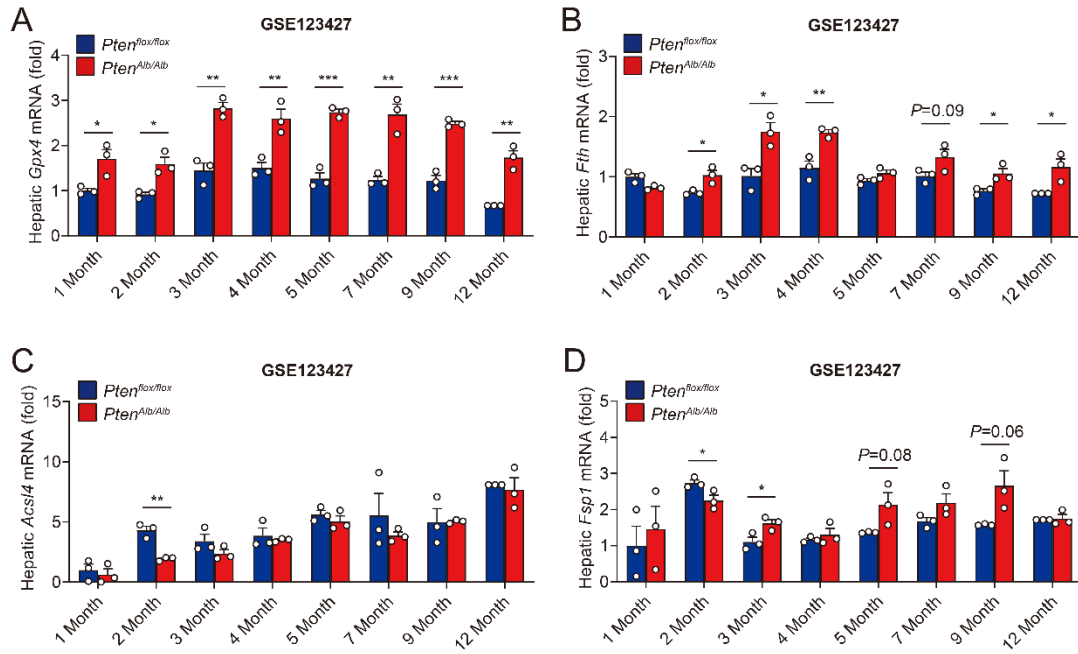

**Figure S7.** Hepatic expression of *Gpx4* (A), *Fth* (B), *Acsl4* (C), and *Fsp1* (D) were measured in  $Pten^{flox/flox}$  and  $Pten^{Alb/Alb}$  mice subjected to I/R injury at different months old. Significance was calculated by Student's *t*-test; \* $P < 0.05$ , \*\* $P < 0.01$ , \*\*\* $P < 0.001$ , n.s.=not significant.

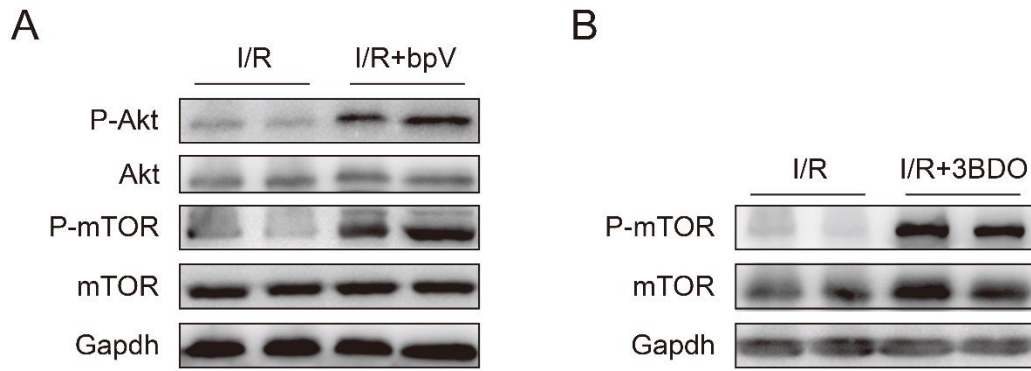

**Figure S8.** Validation of PTEN inhibitor (bpV) and mTOR activator (3BDO). (A) Immunoblots of hepatic P-Akt, Akt, P-mTOR, and mTOR were measured in I/R-treated mice with or without PTEN inhibitor bpV injection. (B) Immunoblots of hepatic P-mTOR, and mTOR were measured in I/R-treated mice with or without mTOR activator 3BDO injection.

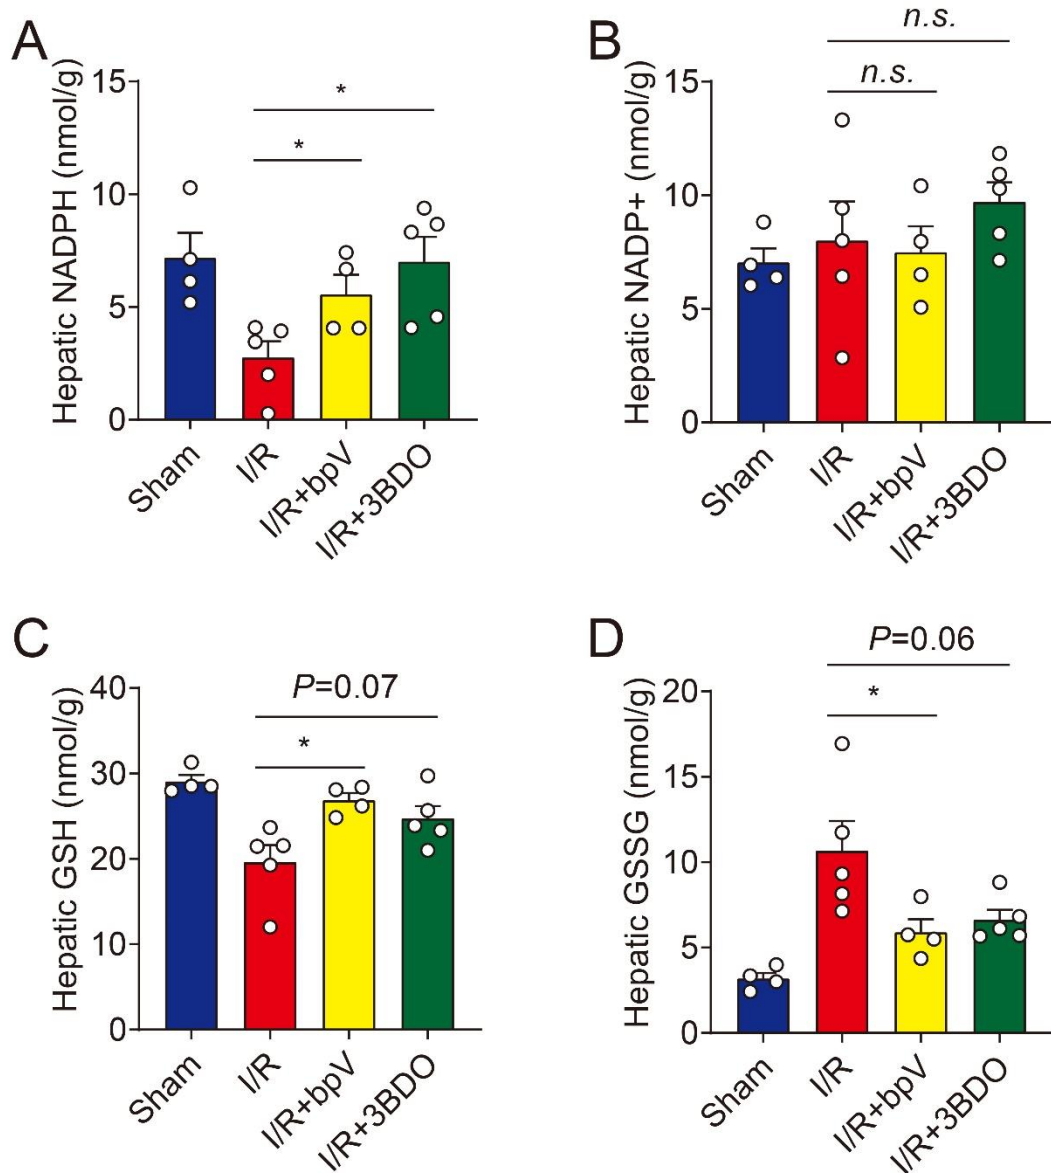

**Figure S9.** Hepatic levels of NADPH (A), NADP<sup>+</sup> (B), GSH (C), and GSSG (D) were measured in I/R-treated mice with bpV or 3BDO injection. Significance was calculated by Student's *t*-test; \**P*<0.05, n.s.=not significant.

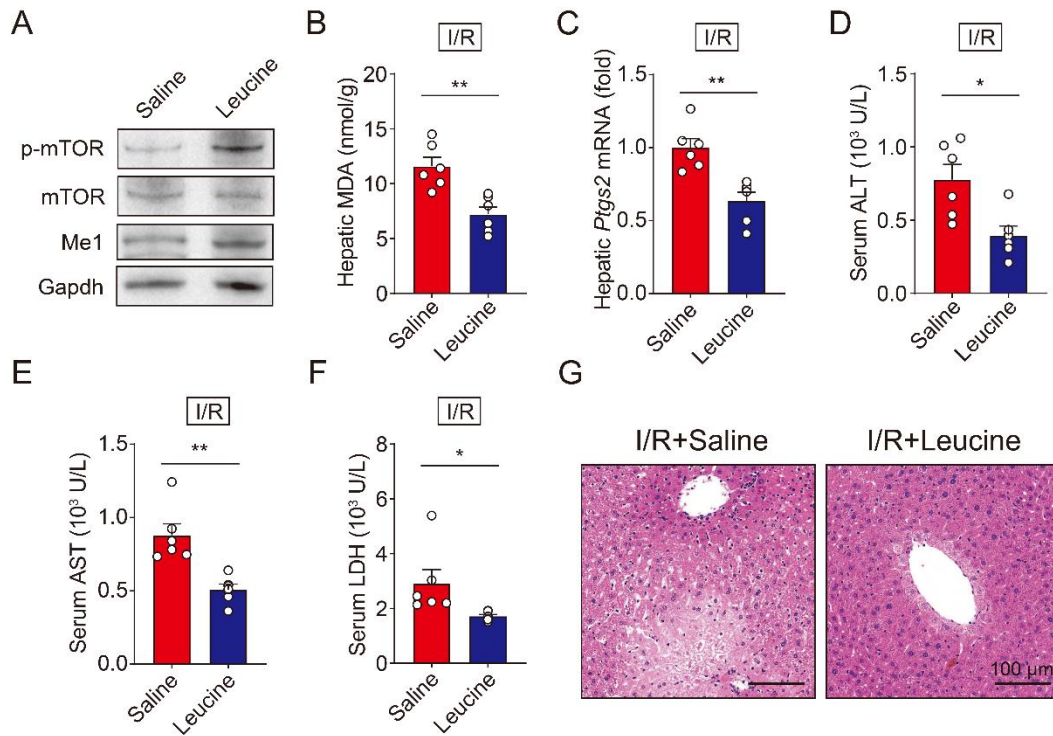

**Figure S10.** L-leucine supplementation protects against hepatic ferroptosis during I/R injury. (A) Immunoblots of hepatic P-mTOR, mTOR, and Me1 were measured in mice with or without leucine supplementation. (B,C) Hepatic *Ptgs2* mRNA (B) and MDA levels (C) were measured in I/R-treated mice with leucine supplementation. (D-F) Serum levels of ALT (D), AST (E) and LDH (F) were measured in I/R-treated mice with leucine supplementation. (G) Representative H&E-stained liver sections from indicated mice. Significance was calculated by Student's t-test; \* $P < 0.05$ , \*\* $P < 0.01$

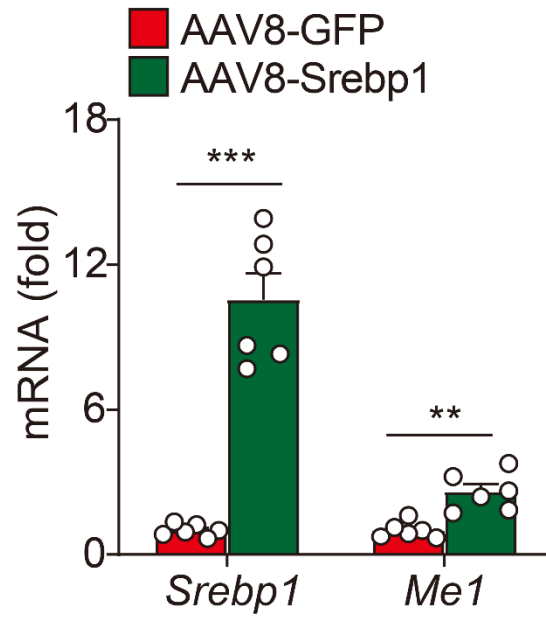

**Figure S11.** Hepatic mRNA of *Srebp1* and *Me1* were measured in mice treated with AAV8-Srebp1 or AAV8-GFP. Significance was calculated by Student's *t*-test; \* $P < 0.05$ , \*\* $P < 0.01$ , \*\*\* $P < 0.001$ .

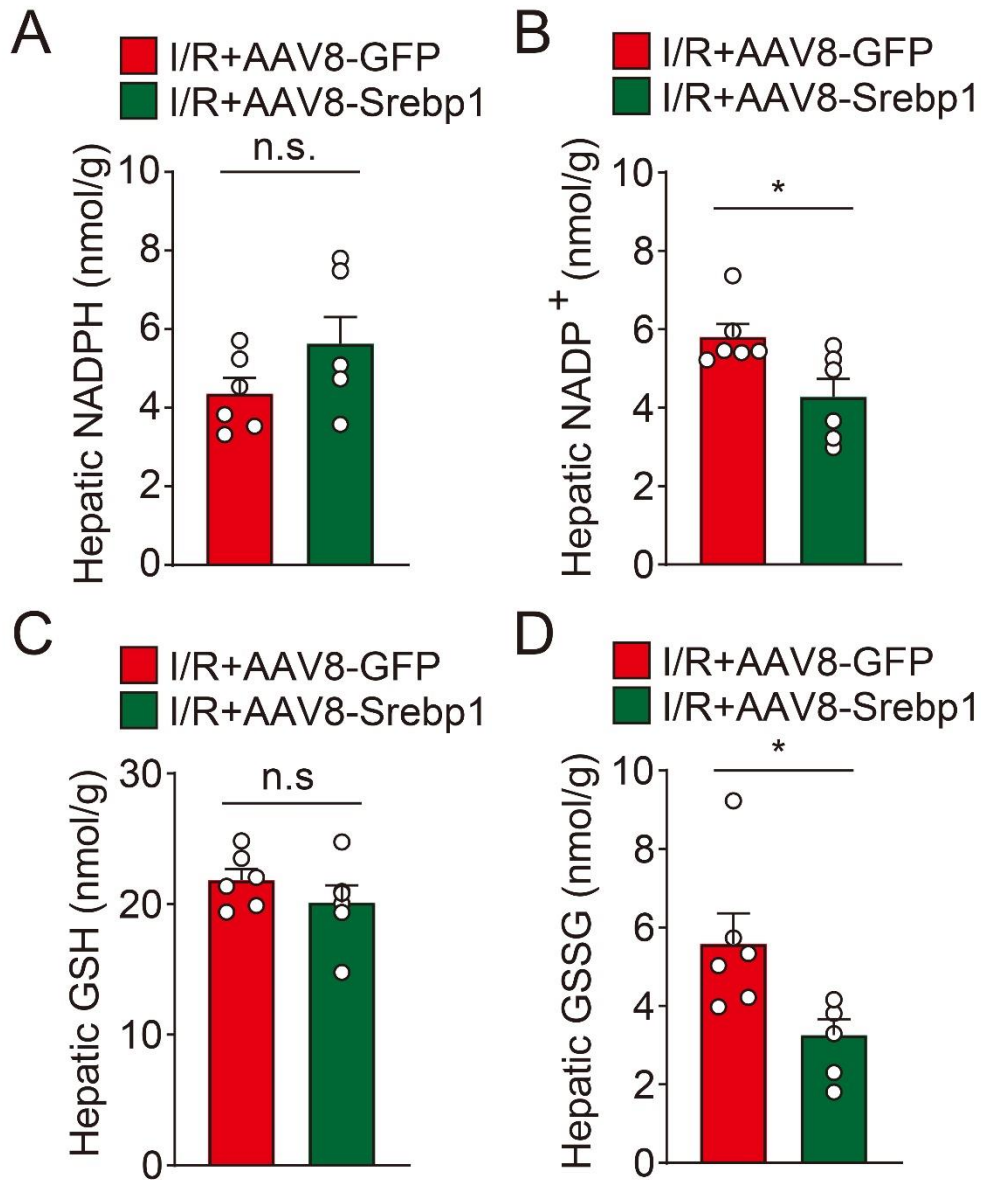

**Figure S12.** Hepatic levels of NADPH (A), NADP<sup>+</sup> (B), GSH (C), and GSSG (D) were measured in I/R-treated mice with or without AAV-mediated *Srebp1* overexpression. Significance was calculated by Student's *t*-test; \**P*<0.05, n.s.=not significant.

**Table S1.** Primers used for genotyping and real-time PCR analysis.

| <b>Gene</b>           | <b>Primer sequence (5'→3')</b> |
|-----------------------|--------------------------------|
| <b>Genotyping</b>     |                                |
| <i>Me1</i> forward    | TAGCCGCACGCTGATGATAG           |
| <i>Me1</i> reverse    | GCAGCTGTCAGACTAGCCAA           |
| <i>Alb-Cre</i> common | TGGCAAACATACGCAAGGG            |
| <i>Alb-Cre</i> mutant | CGGCAAACGGACAGAAGCA            |
| <i>Alb-Cre</i> mutant | GGCAATGGTTCCTCTCTGCT           |
| <b>Real-time PCR</b>  |                                |
| <i>Gapdh</i> forward  | ATCATCCCTGCATCCACT             |
| <i>Gapdh</i> reverse  | ATCCACGACGGACACATT             |
| <i>Ptgs2</i> forward  | CTGCGCCTTTTCAAGGATGG           |
| <i>Ptgs2</i> reverse  | GGGGATACACCTCTCCACCA           |
| <i>Me1</i> forward    | GTCGTGCATCTCTCACAGAAG          |
| <i>Me1</i> reverse    | TGAGGGCAGTTGGTTTTATCTTT        |
| <i>Me2</i> forward    | TACCACTCCTTGTACCTTGACC         |
| <i>Me2</i> reverse    | TCTTGTAACGTAAACGCCATTCC        |
| <i>G6pd</i> forward   | TCAGACAGGCTTTAACCGCAT          |
| <i>G6pd</i> reverse   | CCATTCCAGATAGGGCCAAAGA         |
| <i>6pgd</i> forward   | TACAGACACGAGATGCTGCC           |
| <i>6pgd</i> reverse   | TGAGCCCCAAAGTAATCCCG           |
| <i>Idh1</i> forward   | GGTTATGGCTCCCTTGGCAT           |
| <i>Idh1</i> reverse   | CCCTTTCTGGTACATGCGGT           |
| <i>Idh2</i> forward   | GGAGAAGCCGGTAGTGGAGAT          |
| <i>Idh2</i> reverse   | GGTCTGGTCACGGTTTGGAA           |
| <i>Mthfd1</i> forward | GGGAATCCTGAACGGGAAACT          |
| <i>Mthfd1</i> reverse | TGAGTGGCTTTGATCCCAATC          |
| <i>Mthfd2</i> forward | AGTGCGAAATGAAGCCGTTG           |
| <i>Mthfd2</i> reverse | GACTGGCGGGATTGTCACC            |

|                        |                       |
|------------------------|-----------------------|
| <i>Aldh1l1</i> forward | CAGGAGGTTTACTGCCAGCTA |
| <i>Aldh1l1</i> reverse | CACGTTGAGTTCTGCACCCA  |
| <i>Aldh1l2</i> forward | ACCAGCCGGGTTTATTTCAA  |
| <i>Aldh1l2</i> reverse | ACTCCCACTACTCGGTGGC   |

---



**Table S2.** Antibodies used in this study.

| <b>Antibody</b>             | <b>Application</b> | <b>Description</b> | <b>Source</b>  | <b>Catalog no.</b> |
|-----------------------------|--------------------|--------------------|----------------|--------------------|
| <b>Primary Antibodies</b>   |                    |                    |                |                    |
| anti-Me1                    | WB/IHC             | Rabbit Polyclonal  | Proteintech    | 16619-1-AP         |
| anti-Pten                   | WB                 | Rabbit Monoclonal  | Cell Signaling | 9559               |
| anti-mTOR                   | WB                 | Rabbit Monoclonal  | Cell Signaling | 2983               |
| anti-P-mTOR                 | WB                 | Rabbit Monoclonal  | Cell Signaling | 5536               |
| anti-Akt                    | WB                 | Rabbit Monoclonal  | Cell Signaling | 4691               |
| anti-P-Akt                  | WB                 | Rabbit Monoclonal  | Cell Signaling | 4060               |
| anti-S6K1                   | WB                 | Rabbit Monoclonal  | Cell Signaling | 2708               |
| anti-P-S6K1                 | WB                 | Rabbit Polyclonal  | Cell Signaling | 9208               |
| anti-Srebp1                 | WB/ChIP            | Mouse Monoclonal   | Santa Cruz     | sc-13551           |
| anti-Gapdh                  | WB                 | Mouse Monoclonal   | Proteintech    | 60004-1-Ig         |
| <b>Secondary Antibodies</b> |                    |                    |                |                    |
| anti-mouse IgG              | WB                 | Goat               | Proteintech    | SA00001-1          |
| anti-rabbit IgG             | WB                 | Goat               | Proteintech    | SA00001-2          |

IHC, immunohistochemistry; WB, western blotting.
